# Supplementary material
Source: publisher figshare collection journal article supplement (https://asha.figshare.com/articles/dataset/_/21965228)
Supplement: Supplementary file 2 [file 1]

**Supplemental Material S2.** Pearson product-moment correlation coefficients between each predictor measure and recognition scores in each babble condition for adolescents with normal hearing and with cochlear implants.

Pearson product-moment correlation coefficients between each predictor measure and recognition scores in each babble condition for adolescents with normal hearing (55).

| <i>Predictor Variable</i> | <i>Female Babble</i> | <i>Male Babble</i> | <i>Six-Talker Babble</i> |
|---------------------------|----------------------|--------------------|--------------------------|
| Vocabulary                | .265                 | .237               | .229                     |
| Syntactic Comprehension   | <b>.525**</b>        | .228               | .339                     |
| Phonological Sensitivity  | .327                 | .328               | .232                     |
| Verbal Working Memory     | <b>.430*</b>         | <b>.375*</b>       | .284                     |
| Spectral Resolution       | -.110                | .008               | -.056                    |
| Perceptual Organization   | .290                 | .351               | -.092                    |

\* $p < .05$ . \*\* $p < .01$ .

Pearson product-moment correlation coefficients between each predictor measure and recognition scores in each babble condition for adolescents with cochlear implants (52).

| <i>Predictor Variable</i> | <i>Female Babble</i> | <i>Male Babble</i> | <i>Six-Talker Babble</i> |
|---------------------------|----------------------|--------------------|--------------------------|
| Vocabulary                | .187                 | .165               | .125                     |
| Syntactic Comprehension   | .145                 | .155               | .039                     |
| Phonological Sensitivity  | <b>.428*</b>         | <b>.445*</b>       | .333                     |
| Verbal Working Memory     | .208                 | .207               | .122                     |
| Spectral Resolution       | -.361                | <b>-.492*</b>      | -.276                    |
| Perceptual Organization   | <b>.634**</b>        | <b>.686**</b>      | <b>.596**</b>            |

\* $p < .05$ . \*\* $p < .01$ .
