# Supplementary material
Source: publisher figshare collection journal article supplement (https://asha.figshare.com/articles/dataset/_/21965228)
Supplement: Supplementary file 3 [file 1]

**Supplemental Material S3.** Pearson product-moment correlation coefficients among predictor measures for adolescents with normal hearing and with cochlear implants.

Pearson product-moment correlation coefficients among predictor measures for adolescents with normal hearing (56).

| <i>Measure</i>          | Syn. Comp.    | Phon. Aware. | Verb. WM      | Spec. Res.     | Perc. Org. |
|-------------------------|---------------|--------------|---------------|----------------|------------|
| Vocabulary              | <b>.487**</b> | <b>.305*</b> | .241          | <b>-.386**</b> | .181       |
| Syntactic Comprehension |               | <b>.288*</b> | <b>.471**</b> | -.156          | .166       |
| Phonological Awareness  |               |              | <b>.493**</b> | <b>-.376**</b> | .075       |
| Verbal Working Memory   |               |              |               | -.199          | -.060      |
| Spectral Resolution     |               |              |               |                | .100       |

\* $p < .05$ . \*\*  $p < .01$

Pearson product-moment correlation coefficients among predictor measures for adolescents with cochlear implants (52).

| <i>Measure</i>          | Syn. Comp.    | Phon. Aware.  | Verb. WM      | Spec. Res.     | Perc. Org.     |
|-------------------------|---------------|---------------|---------------|----------------|----------------|
| Vocabulary              | <b>.559**</b> | <b>.413**</b> | <b>.539**</b> | -.032          | -.092          |
| Syntactic Comprehension |               | <b>.410**</b> | <b>.552**</b> | -.243          | -.028          |
| Phonological Awareness  |               |               | <b>.340*</b>  | <b>-.388**</b> | <b>.389**</b>  |
| Verbal Working Memory   |               |               |               | -.177          | -.026          |
| Spectral Resolution     |               |               |               | □              | <b>-.444**</b> |

\* $p < .05$ .  $p < .01$ .
